# Supplementary material for: Protective and therapeutic role for αB-crystallin in autoimmune demyelination
Source: Springer Nature journal article supplement (doi:10.1038/nature05935), 2007-06-13
Supplement: 41586_2007_BFnature05935_MOESM354_ESM.pdf [file 41586_2007_BFnature05935_MOESM354_ESM.pdf]

## SUPPLEMENTARY INFORMATION

**Supplementary Table S1: Cumulative analysis of four experiments comparing WT vs  $\alpha$ BC<sup>-/-</sup> mice with EAE.**

| Days | # WT EAE mice | # $\alpha$ BC <sup>-/-</sup> EAE mice | p value<br>Mann Whitney |
|------|---------------|---------------------------------------|-------------------------|
| 12   | 27            | 27                                    | 0.044                   |
| 13   | 27            | 27                                    | 0.105                   |
| 14   | 27            | 27                                    | 0.230                   |
| 15   | 27            | 27                                    | 0.058                   |
| 16   | 27            | 27                                    | 0.103                   |
| 17   | 27            | 27                                    | 0.0051                  |
| 18   | 27            | 27                                    | 0.0045                  |
| 19   | 27            | 27                                    | 0.0012                  |
| 20   | 27            | 27                                    | 0.0018                  |
| 21   | 27            | 27                                    | 0.0039                  |
| 22   | 27            | 27                                    | 0.0367                  |
| 23   | 26            | 26                                    | 0.0367                  |
| 24   | 25            | 25                                    | 0.1492                  |
| 25   | 25            | 25                                    | 0.156                   |
| 26   | 25            | 25                                    | 0.0968                  |
| 27   | 25            | 25                                    | 0.0465                  |
| 28   | 25            | 25                                    | 0.0475                  |
| 29   | 25            | 25                                    | 0.0174                  |
| 30   | 20            | 20                                    | 0.0055                  |
| 31   | 20            | 20                                    | 0.005                   |
| 32   | 20            | 20                                    | 0.0041                  |
| 33   | 20            | 19                                    | 0.0045                  |
| 34   | 20            | 19                                    | 0.0003                  |
| 35   | 20            | 19                                    | 0.0037                  |
| 36   | 20            | 19                                    | 0.0069                  |
| 37   | 20            | 19                                    | 0.0014                  |
| 38   | 20            | 19                                    | 0.0007                  |
| 39   | 20            | 19                                    | 0.0078                  |
| 40   | 20            | 19                                    | 0.009                   |
| 41   | 15            | 15                                    | 0.0351                  |

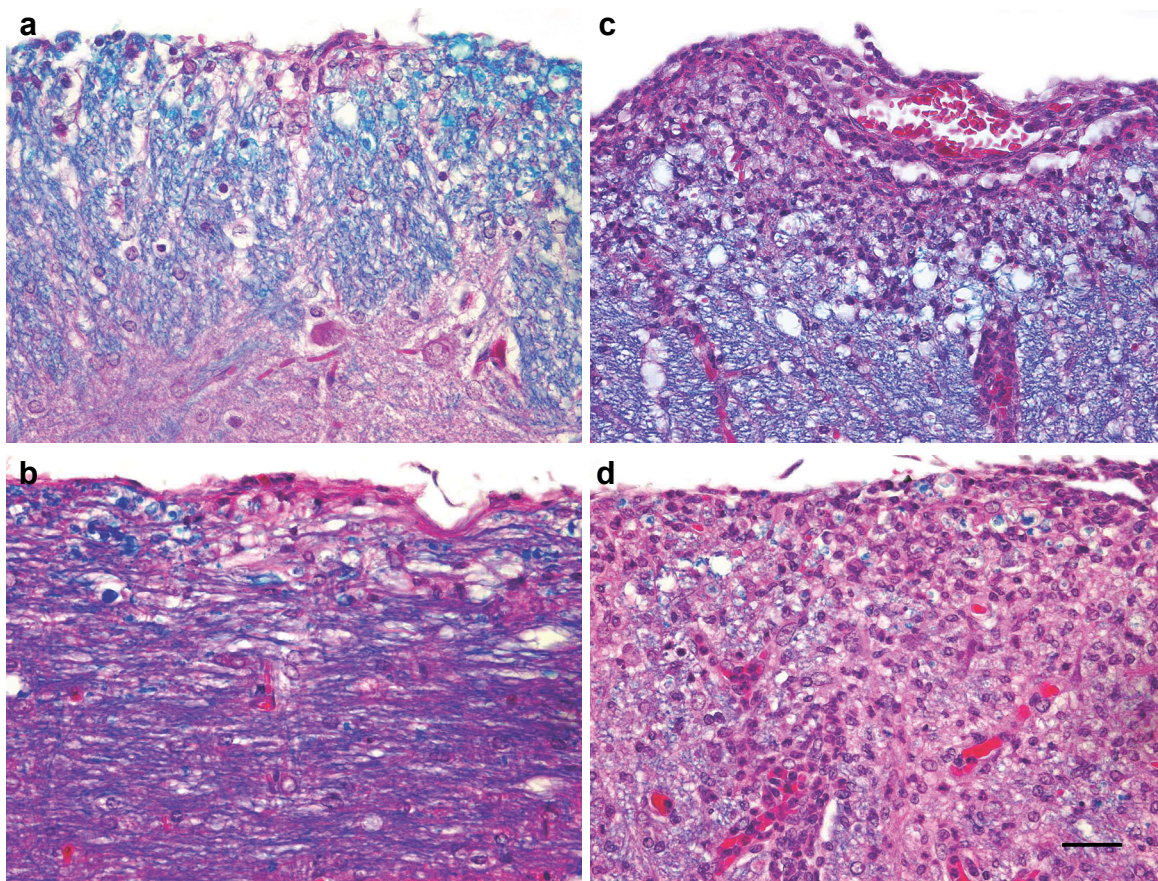

**Supplementary Figure S1:  $\alpha BC^{-/-}$  mice have more severe inflammatory/demyelinating lesions in acute and progressive EAE.** Paraffin-embedded spinal cord sections taken at day 14 (a, c) and day 42 (b, d) from WT (a, b) and  $\alpha BC^{-/-}$  (c, d) animals with EAE and stained with luxol fast blue and hematoxylin-eosin. Scale bar=200  $\mu m$ .



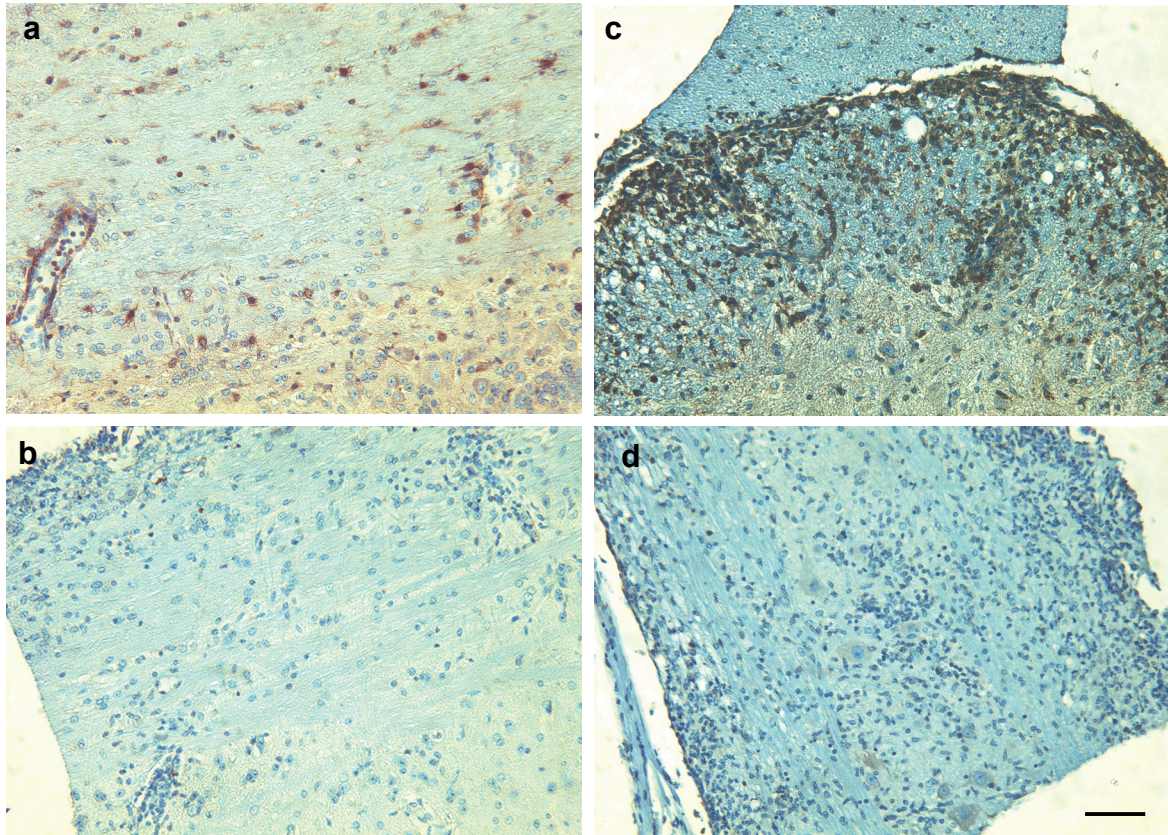

**Supplementary Figure S2:  $\alpha BC^{-/-}$  mice have higher expression of uncleaved caspase-3 in acute EAE.** Paraffin-embedded spinal cord sections taken at day 14 from WT (a, b) and  $\alpha BC^{-/-}$  (c, d) animals with EAE and immuno-stained for cleaved (b, d) and uncleaved caspase-3 (a, c). Scale bar=400  $\mu m$ .



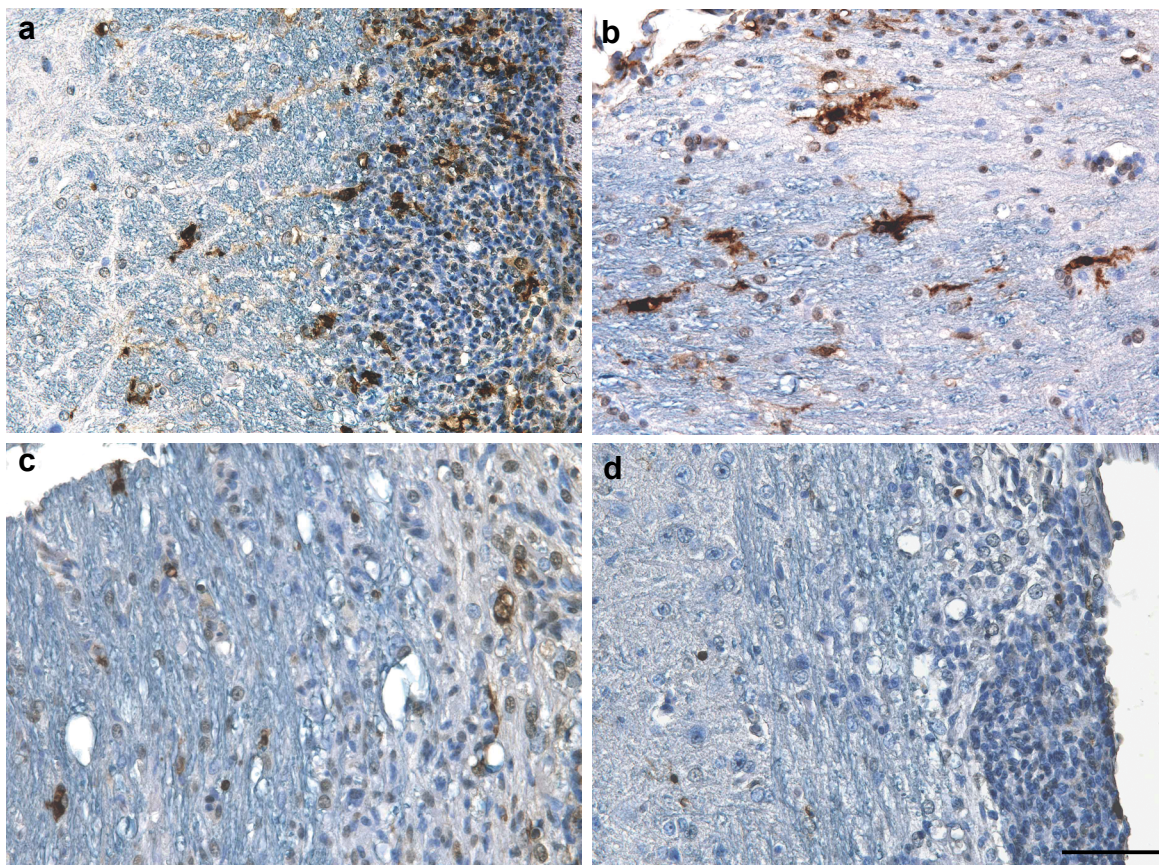

**Supplementary Figure S3: EAE mice treated with  $\alpha$ BC have fewer TUNEL positive cells in their spinal cord.** Paraffin-embedded spinal cord sections taken at day 32 from WT mice with EAE and treated with PBS (a, b) and recombinant  $\alpha$ BC (c, d) and processed for TUNEL staining. Scale bar=100  $\mu$ m.



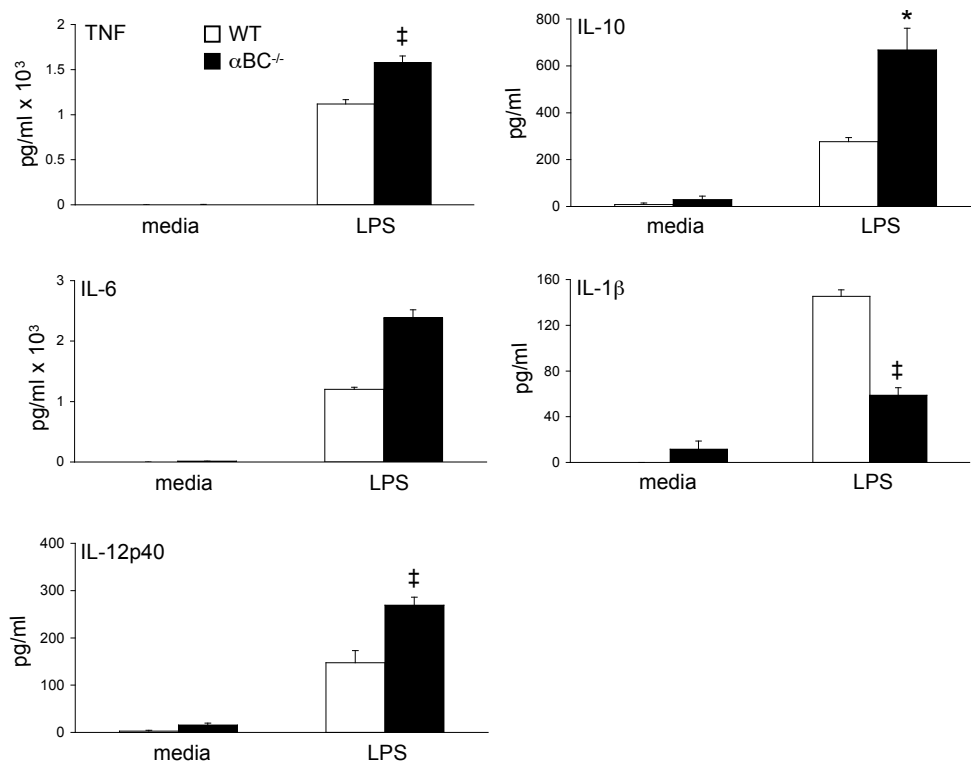

**Supplementary Figure S4:  $\alpha BC^{-/-}$  dendritic cells are hyper-responsive.** Representative graphs from two experiments showing production of cytokines (IL-1 $\beta$ , TNF, IL-6, IL-12p40, IL-10) (pg/ml) by WT (□) and  $\alpha BC^{-/-}$  (■) dendritic cells stimulated *in vitro* with LPS for 48h or 72h, mean  $\pm$  s.e.m.; \*p < 0.02, ‡p < 0.005, Student's t-test.

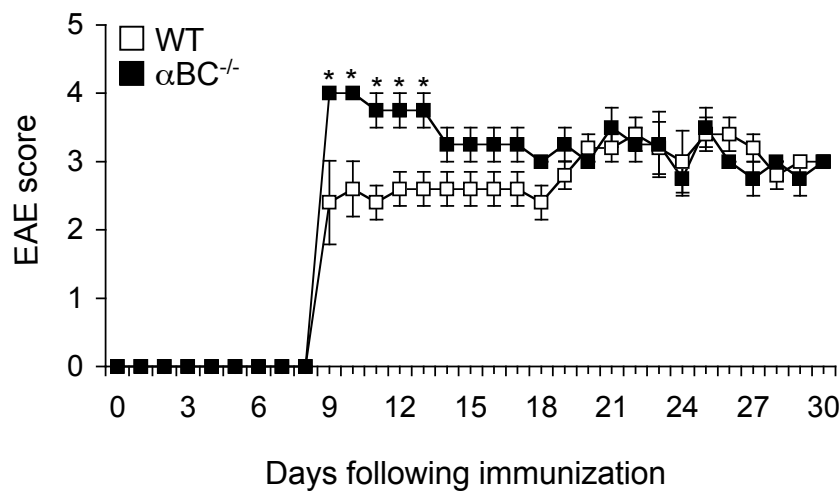

**Supplementary Figure S5:  $Rag2^{-/-}$  mice adoptively transferred with  $\alpha BC^{-/-}$  splenocytes developed worse clinical EAE at the acute phase.** (a) Mean  $\pm$  s.e.m. clinical scores of  $Rag2^{-/-}$  mice adoptively transferred with MOG-reactive WT ( $\square$ ) or  $\alpha BC^{-/-}$  ( $\blacksquare$ ) splenocytes; \* $p < 0.05$ , Student's t-test,  $n = 5$  animals/group.



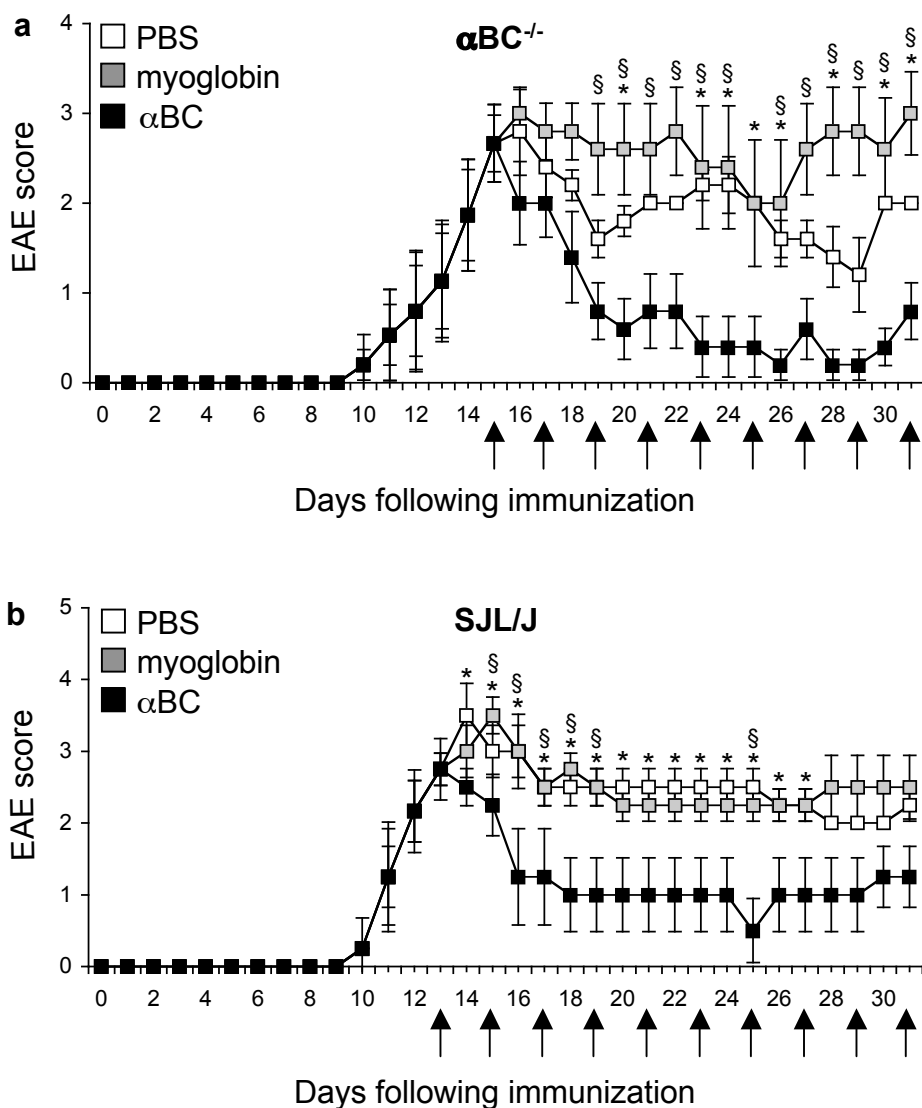

**Supplementary Figure S6: Recombinant  $\alpha\text{BC}$  suppresses Clinical disease in  $\alpha\text{BC}^{-/-}$  and SJL/J mice with EAE.** Mean  $\pm$  s.e.m. clinical scores of  $\alpha\text{BC}^{-/-}$  and SJL/J (b) EAE mice treated with recombinant  $\alpha\text{BC}$  ( $\blacksquare$ ), PBS ( $\square$ ) or recombinant myoglobin ( $\blacksquare$ ) following immunization with MOG 35-55 ( $\alpha\text{BC}^{-/-}$ ) or PLP 139-151 (SJL/J); \* $p < 0.05$  Mann-Whitney,  $\alpha\text{BC}^{-/-}$  n=2 experiments, SJL/J n=1 experiment (\* $\alpha\text{BC}$  vs PBS) ( $\S$  $\alpha\text{BC}$  vs myoglobin). Linear regression: days 13-22:  $\alpha\text{BC}$  vs PBS,  $p = 0.0156$ ;  $\alpha\text{BC}$  vs myoglobin,  $p = 0.038$  b) days 15-25:  $\alpha\text{BC}$  vs PBS,  $p = 0.014$ ;  $\alpha\text{BC}$  vs myoglobin,  $p = 0.0093$ .

**Supplementary Table S2: Densitometric quantification of protein level, following normalization to actin, in WT and  $\alpha$ BC<sup>-/-</sup> CD3<sup>+</sup> T cells stimulated with media or MOG and irradiated syngeneic splenocytes.**

| T cell | Experiment                        | WT media                                      | $\alpha$ BC <sup>-/-</sup> media              | WT MOG                                         | $\alpha$ BC <sup>-/-</sup> MOG                 |
|--------|-----------------------------------|-----------------------------------------------|-----------------------------------------------|------------------------------------------------|------------------------------------------------|
| p-p38  | 1                                 | 1.16                                          | 1.21                                          | 1.44                                           | 1.64                                           |
|        | 2                                 | 0.81                                          | 1.05                                          | 1.33                                           | 1.99                                           |
|        | <b>mean <math>\pm</math> s.d.</b> | <b>0.99 <math>\pm</math> 0.25<sup>^</sup></b> | <b>1.13 <math>\pm</math> 0.11<sup>#</sup></b> | <b>1.39 <math>\pm</math> 0.08<sup>*^</sup></b> | <b>1.82 <math>\pm</math> 0.25<sup>*#</sup></b> |
| p38    | 1                                 | 1.23                                          | 1.56                                          | 1.81                                           | 2.01                                           |
|        | 2                                 | 0.67                                          | 0.72                                          | 0.88                                           | 1.26                                           |
|        | <b>mean <math>\pm</math> s.d.</b> | <b>0.95 <math>\pm</math> 0.40</b>             | <b>1.14 <math>\pm</math> 0.59</b>             | <b>1.35 <math>\pm</math> 0.66</b>              | <b>1.64 <math>\pm</math> 0.53</b>              |

\*p=0.072 (p-p38: WT MOG vs  $\alpha$ BC<sup>-/-</sup> MOG)

#p=0.035 (p-p38:  $\alpha$ BC<sup>-/-</sup> media vs  $\alpha$ BC<sup>-/-</sup> MOG)

<sup>^</sup>p=0.08 (p-p38 WT media vs WT MOG)

Student's t-test



**Supplementary Table S3: Densitometric quantification of protein level, following normalization to actin, in WT and  $\alpha BC^{-/-}$  macrophages stimulated with media or LPS.**

| <b>Macrophage</b> | <b>Experiment</b>                 | <b>WT media</b>                   | <b><math>\alpha BC^{-/-}</math> media</b> | <b>WT LPS</b>                     | <b><math>\alpha BC^{-/-}</math> LPS</b> |
|-------------------|-----------------------------------|-----------------------------------|-------------------------------------------|-----------------------------------|-----------------------------------------|
| <i>p-p38</i>      | 1                                 | 1.54                              | 1.55                                      | 2.01                              | 2.21                                    |
|                   | 2                                 | 1.25                              | 1.45                                      | 1.34                              | 1.89                                    |
|                   | <b>mean <math>\pm</math> s.d.</b> | <b>1.40 <math>\pm</math> 0.21</b> | <b>1.50 <math>\pm</math> 0.07*</b>        | <b>1.68 <math>\pm</math> 0.47</b> | <b>2.05 <math>\pm</math> 0.23*</b>      |
| <i>p38</i>        | 1                                 | 1.29                              | 1.42                                      | 1.57                              | 1.81                                    |
|                   | 2                                 | 1.89                              | 2.00                                      | 2.01                              | 2.28                                    |
|                   | <b>mean <math>\pm</math> s.d.</b> | <b>1.59 <math>\pm</math> 0.42</b> | <b>1.71 <math>\pm</math> 0.41</b>         | <b>1.79 <math>\pm</math> 0.26</b> | <b>2.05 <math>\pm</math> 0.33</b>       |

\*p=0.041 (p-p38:  $\alpha BC^{-/-}$  media vs  $\alpha BC^{-/-}$  LPS)  
Student's t-test

**Supplementary Table S4: Densitometric quantification of protein level, following normalization to actin, in WT and  $\alpha$ BC<sup>-/-</sup> astrocytes stimulated with media or TNF.**

| Astrocytes                   | Experiment                        | WT media                                      | $\alpha$ BC <sup>-/-</sup> media              | WT TNF                                        | $\alpha$ BC <sup>-/-</sup> TNF                |
|------------------------------|-----------------------------------|-----------------------------------------------|-----------------------------------------------|-----------------------------------------------|-----------------------------------------------|
| <i>p</i> -ERK                | 1                                 | 1.04                                          | 0.91                                          | 1.00                                          | 1.07                                          |
|                              | 2                                 | 0.72                                          | 0.45                                          | 0.84                                          | 1.23                                          |
|                              | <b>mean <math>\pm</math> s.d.</b> | <b>0.88 <math>\pm</math> 0.23</b>             | <b>0.68 <math>\pm</math> 0.33</b>             | <b>0.92 <math>\pm</math> 0.11</b>             | <b>1.15 <math>\pm</math> 0.11</b>             |
| ERK                          | 1                                 | 2.32                                          | 2.20                                          | 1.95                                          | 2.44                                          |
|                              | 2                                 | 1.25                                          | 1.32                                          | 1.35                                          | 2.21                                          |
|                              | <b>mean <math>\pm</math> s.d.</b> | <b>1.79 <math>\pm</math> 0.78</b>             | <b>1.76 <math>\pm</math> 0.62</b>             | <b>1.65 <math>\pm</math> 0.42</b>             | <b>2.33 <math>\pm</math> 0.16</b>             |
| <i>p</i> 38                  | 1                                 | 2.97                                          | 2.23                                          | 1.78                                          | 2.61                                          |
|                              | 2                                 | 1.84                                          | 2.05                                          | 1.74                                          | 3.60                                          |
|                              | <b>mean <math>\pm</math> s.d.</b> | <b>2.41 <math>\pm</math> 0.80</b>             | <b>2.14 <math>\pm</math> 0.13</b>             | <b>1.76 <math>\pm</math> 0.03<sup>^</sup></b> | <b>3.11 <math>\pm</math> 0.70<sup>^</sup></b> |
| <i>NF</i> $\kappa$ Bp50      | 1                                 | 0.46                                          | 2.91                                          | 0.44                                          | 2.74                                          |
|                              | 2                                 | 0.52                                          | 2.44                                          | 0.51                                          | 3.63                                          |
|                              | <b>mean <math>\pm</math> s.d.</b> | <b>0.49 <math>\pm</math> 0.05<sup>#</sup></b> | <b>2.67 <math>\pm</math> 0.33<sup>#</sup></b> | <b>0.48 <math>\pm</math> 0.05<sup>*</sup></b> | <b>3.19 <math>\pm</math> 0.63<sup>*</sup></b> |
| <i>NF</i> $\kappa$ Bp65      | 1                                 | 2.11                                          | 1.43                                          | 1.31                                          | 1.78                                          |
|                              | 2                                 | 3.19                                          | 1.58                                          | 2.64                                          | 2.56                                          |
|                              | <b>mean <math>\pm</math> s.d.</b> | <b>2.65 <math>\pm</math> 0.76</b>             | <b>1.51 <math>\pm</math> 0.11</b>             | <b>1.98 <math>\pm</math> 0.94</b>             | <b>2.17 <math>\pm</math> 0.55</b>             |
| <i>I</i> $\kappa$ B $\alpha$ | 1                                 | 1.31                                          | 1.85                                          | 1.50                                          | 1.03                                          |
|                              | 2                                 | 1.04                                          | 1.16                                          | 1.50                                          | 0.64                                          |
|                              | <b>mean <math>\pm</math> s.d.</b> | <b>1.18 <math>\pm</math> 0.19</b>             | <b>1.51 <math>\pm</math> 0.49</b>             | <b>1.5 <math>\pm</math> 0<sup>‡</sup></b>     | <b>0.84 <math>\pm</math> 0.28<sup>‡</sup></b> |
| cleaved caspase 3            | 1                                 | 0.77                                          | 0.86                                          | 0.71                                          | 1.68                                          |
|                              | 2                                 | 1.11                                          | 1.29                                          | 0.98                                          | 1.73                                          |
|                              | <b>mean <math>\pm</math> s.d.</b> | <b>0.94 <math>\pm</math> 0.24</b>             | <b>1.08 <math>\pm</math> 0.30</b>             | <b>0.85 <math>\pm</math> 0.19<sup>*</sup></b> | <b>1.71 <math>\pm</math> 0.04<sup>*</sup></b> |
| $\alpha$ BC                  | 1                                 | 1.30                                          | 0                                             | 1.76                                          | 0                                             |
|                              | 2                                 | 2.22                                          | 0                                             | 3.13                                          | 0                                             |
|                              | <b>mean <math>\pm</math> s.d.</b> | <b>1.76 <math>\pm</math> 0.65</b>             | <b>0</b>                                      | <b>2.45 <math>\pm</math> 0.97</b>             | <b>0</b>                                      |

<sup>#</sup>p=0.006 (*NF* $\kappa$ Bp50: WT media vs  $\alpha$ BC<sup>-/-</sup> media)

<sup>\*</sup>p=0.012 (*NF* $\kappa$ Bp50, cleaved caspase-3: WT TNF vs  $\alpha$ BC<sup>-/-</sup> TNF)

<sup>‡</sup>p=0.038 (*I* $\kappa$ B $\alpha$ : WT TNF vs  $\alpha$ BC<sup>-/-</sup> TNF)

<sup>^</sup>p=0.056 (*p*38: WT TNF vs  $\alpha$ BC<sup>-/-</sup> TNF)

Student's t-test



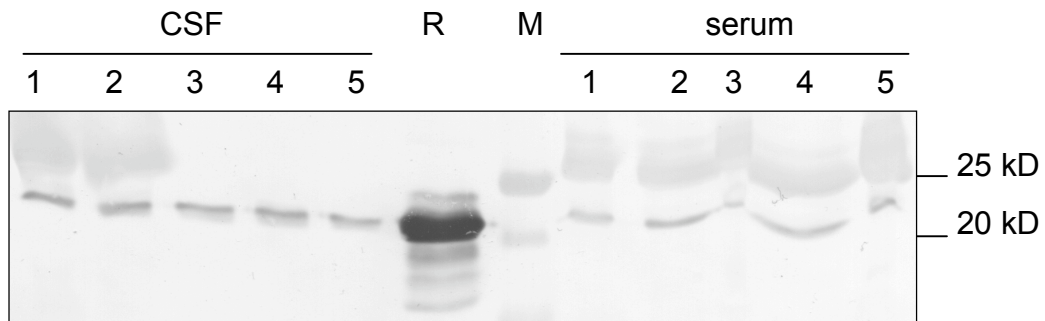

**Supplementary Figure S7:  $\alpha$ BC is present in sera and CSF of MS patients.** Western blot analysis of free  $\alpha$ BC in sera and CSF of MS patients. Human recombinant  $\alpha$ BC (0.4 mg) was used as a reference(R). Molecular markers (M) indicate 20 and 25 kDa positions.
